# Supplementary material
Source: Springer Nature journal article supplement (https://www.springermedizin.de/resource/supplementary/12936_2009_965_MOESM1_ESM.pdf/9548650)
Supplement: MOESM1 [file 9548650]

**Village/Health facility**

1. ID number
2. GPS location
3. # of households
4. # of participants

**Socio-demographics**

1. Sex
2. Age
3. Ethnicity
4. Religion
5. Ownership of items
6. Electricity availability
7. School education

**Coverage and adherence**

1. ITN coverage
2. Use ITNs every night
3. Re-treatment of ITNs

**Other factors**

1. Attendance of health education
2. Mosquito bites

**Malaria RDTs**

1. # of positive
2. # of negative
3. # of suspected
